# Supplementary material for: Generalizability of GWA-Identified Genetic Risk Variants for Metabolic Traits to Populations from the Arabian Peninsula
Source: MDPI journal article supplement (doi:10.3390/genes12101637), 2021-10-18
Supplement: s1 [file s1]

Supplementary Table S1. List of the 304 GWA-identified metabolic risk variants transferable to Arab population from Kuwait.

| Variant (hg19) | Populations in which the association of the variant was identified                                                                                                                                                        | Replication Count | RSID       | Gene                     |
|----------------|---------------------------------------------------------------------------------------------------------------------------------------------------------------------------------------------------------------------------|-------------------|------------|--------------------------|
| 1:177889480    | European,Indian,Korean,AfricanAmerican,Jamaican,Filipino,African American/Afro-Caribbean,Hispanic/Latino,Nigerian,Sub-SaharanAfrican,Hispanic,Seychelles,SouthAsian,Japanese,African,Seychellois,EastAsian,AfricanBritish | 18                | rs543874   | LOC101928778 - SEC16B    |
| 11:116648917   | European,Indian,AfricanAmerican,Hispanic,Mexican,SaudiArabian,LatinAmerican/Hispanic,Mylopotamos,Pomak,EastAsian,Chinese,Yoruban,Filipino                                                                                 | 13                | rs964184   | ZNF259                   |
| 1:96924097     | European,AfricanAmerican/Afro-Caribbean,Indian,Filipino,Hispanic/Latino,AfricanAmerican,Hispanic,Seychelles,SouthAsian,Japanese,EastAsian,AfricanBritish                                                                  | 12                | rs11165643 | EEF1A1P11 - LOC105378866 |
| 2:632348       | European,AfricanAmerican/Afro-Caribbean,Indian,Filipino,Hispanic/Latino,AfricanAmerican,Hispanic,Seychelles,SouthAsian,Japanese,EastAsian,AfricanBritish                                                                  | 12                | rs13021737 | LOC105373352 - TMEM18    |
| 16:56993324    | European,Indian,NorthernFinnish,AfricanAmerican,AfricanAmerican/Afro-Caribbean,Japanese,HanChinese,Korean,EastAsian,British,Chinese                                                                                       | 11                | rs3764261  | CETP                     |
| 16:81534790    | European,AfricanAmerican,Filipino,EastAsian,AfricanAmerican/Afro-Caribbean,SouthAsian,Seychellois,Indian,Hispanic/Latino,Chinese,Japanese                                                                                 | 11                | rs2925979  | CMIP                     |
| 6:163033350    | AfricanAmerican,European,Filipino,Indian,AfricanAmerican/Afro-Caribbean,Hispanic/Latino,Hispanic,Seychelles,SouthAsian,EastAsian,AfricanBritish                                                                           | 11                | rs13191362 | PARK2                    |
| 2:27730940     | European,Indian,Orcadian,Hispanic,Afro-Caribbean,Thai,FrenchCanadian,Japanese,Mexican,EastAsian,Chinese                                                                                                                   | 11                | rs1260326  | GCKR                     |

|             |                                                                                                                                          |    |           |                        |
|-------------|------------------------------------------------------------------------------------------------------------------------------------------|----|-----------|------------------------|
| 2:56096892  | European,Japanese,EastAsian,AfricanAmerican,Filipino,Indian,AfricanAmerican/Afro-Caribbean,Hispanic/Latino,SouthAsian,Seychellois        | 10 | rs3791679 | EFEMP1                 |
| 13:79580919 | European,AfricanAmerican,Hispanic,AfricanAmerican/Afro-Caribbean,Filipino,Seychelles,SouthAsian,Hispanic/Latino,EastAsian,AfricanBritish | 10 | rs1441264 | LOC105370273 - NIPA2P5 |
| 14:79899454 | European,AfricanAmerican,Filipino,Indian,AfricanAmerican/Afro-Caribbean,Hispanic/Latino,Hispanic,Seychelles,SouthAsian,Japanese          | 10 | rs7141420 | NRXN3                  |
| 3:64718258  | European,Filipino,AfricanAmerican/Afro-Caribbean,SouthAsian,Seychellois,AfricanAmerican,Indian,Hispanic/Latino,EastAsian,AfricanBritish  | 10 | rs2371767 | ADAMTS9-AS2            |
| 2:635721    | European,Indian,Korean,AfricanAmerican,Jamaican,Filipino,AfricanAmerican/Afro-Caribbean,SouthAsian,Seychellois                           | 9  | rs6755502 | LOC105373352 - TMEM18  |
| 1:109817192 | Mexican,LatinAmerican/Hispanic,European,AfricanAmerican,HispanicAmerican,SouthAsian,Lebanese,EastAsian                                   | 8  | rs7528419 | CELSR2                 |
| 1:184020945 | European,AfricanAmerican,Filipino,Indian,AfricanAmerican/Afro-Caribbean,Hispanic/Latino,SouthAsian,Seychellois                           | 8  | rs2274432 | TSEN15                 |
| 7:2801803   | European,AfricanAmerican,Filipino,Indian,Turkish,Moroccan,Surinamese,Chinese                                                             | 8  | rs798489  | GNA12,AMZ1             |
| 20:45558831 | European,Filipino,AfricanAmerican/Afro-Caribbean,SouthAsian,Seychellois,AfricanAmerican,Indian,Hispanic/Latino                           | 8  | rs6090583 | EYA2                   |
| 3:138108083 | AfricanAmerican,European,Filipino,Indian,Hispanic/Latino,EastAsian,SouthAsian,AfricanBritish                                             | 8  | rs1720825 | MRAS                   |
| 22:29449477 | European,Filipino,AfricanAmerican/Afro-Caribbean,SouthAsian,Seychellois,AfricanAmerican,Indian,Hispanic/Latino                           | 8  | rs2294239 | ZNRF3                  |
| 2:27741237  | European,Orcadian,AfricanAmerican,Hispanic,SaudiArabian,EastAsian,SouthAsian,Chinese                                                     | 8  | rs780094  | GCKR                   |

|              |                                                                                                                |   |            |                          |
|--------------|----------------------------------------------------------------------------------------------------------------|---|------------|--------------------------|
| 6:105378954  | European,AfricanAmerican,Filipino,Indian,AfricanAmerican/Afro-Caribbean,SouthAsian,Seychellois,EastAsian       | 8 | rs7759938  | LOC100422315 - LINC00577 |
| 1:177852580  | European,AfricanAmerican,Filipino,Indian,Japanese,AfricanAmerican/Afro-Caribbean,SouthAsian,Seychellois        | 8 | rs633715   | LOC101928778 - SEC16B    |
| 6:130345835  | European,EastAsian,AfricanAmerican,Turkish,Moroccan,Surinamese,Chinese,Filipino                                | 8 | rs1415701  | L3MBTL3                  |
| 4:145574844  | European,AfricanAmerican,Filipino,Indian,AfricanAmerican/Afro-Caribbean,SouthAsian,Seychellois,Hispanic/Latino | 8 | rs1812175  | HHIP                     |
| 11:116663707 | Filipino,HanChinese,TaiwaneseHanChinese,EastAsian,European,Chinese,Yoruban                                     | 7 | rs662799   | ZNF259                   |
| 12:112059557 | European,AfricanAmerican,Asian,Hispanic,LatinAmerican,AfricanAmerican/Afro-Caribbean,African                   | 7 | rs11065979 | ATXN2 - BRAP             |
| 8:126477978  | Korean,EastAsian,European,AfricanAmerican/Afro-Caribbean,Indian,Filipino,Hispanic/Latino                       | 7 | rs2001945  | TRIB1 - LOC105375746     |
| 6:26091179   | European,AfricanAmerican,Hispanic,African,Asian,Brazilian,SouthAsian                                           | 7 | rs1799945  | HFE                      |
| 22:29450923  | AfricanAmerican,European,Filipino,Indian,AfricanAmerican/Afro-Caribbean,SouthAsian,Seychellois                 | 7 | rs2179129  | ZNRF3                    |
| 22:38595411  | European,Indian,Korean,AfricanAmerican,Jamaican,EastAsian,Chinese                                              | 7 | rs3761445  | PLA2G6 - MAFF            |
| 19:45392254  | European,Indian,Korean,AfricanAmerican,Jamaican,EastAsian,Latino                                               | 7 | rs6857     | PVRL2                    |
| 3:64701146   | European,AfricanAmerican/Afro-Caribbean,Indian,Filipino,Hispanic/Latino,SouthAsian,Seychellois                 | 7 | rs9860730  | ADAMTS9-AS2              |
| 4:145601863  | European,AfricanAmerican,Turkish,Moroccan,Surinamese,Chinese,Filipino                                          | 7 | rs6537307  | HHIP                     |
| 8:41533514   | European,AfricanAmerican,Turkish,Moroccan,Surinamese,Chinese,Filipino                                          | 7 | rs13266210 | ANK1                     |
| 12:112072424 | European,Hispanic/Latino,EastAsian,AfricanAmerican,SouthAsian,AfricanBritish                                   | 6 | rs11065987 | ATXN2 - BRAP             |
| 9:126590687  | European,Hispanic/Latino,EastAsian,AfricanAmerican,SouthAsian,A                                                | 6 | rs541160   | DENND1A                  |

|             |                                                                                       |   |                    |                             |
|-------------|---------------------------------------------------------------------------------------|---|--------------------|-----------------------------|
|             | fricanBritish                                                                         |   |                    |                             |
| 10:94462882 | European,Japanese,EastAsian,SouthernAsian,Mexican,Pakistani                           | 6 | rs1111875,CR072313 | HHEX - EXOC6                |
| 2:622827    | European,AfricanAmerican,Filipino,Indian,SouthernAsian,EastAsian                      | 6 | rs2867125          | LOC105373352 - TMEM18       |
| 7:46008110  | European,African,Korean,Hispanic,AfricanAmerican,SouthernAsian                        | 6 | rs11977526         | LOC102723446                |
| 15:95267483 | European,Hispanic/Latino,EastAsian,AfricanAmerican,SouthernAsian,AfricanBritish       | 6 | rs7181659          | LOC105370986 - LOC105370987 |
| 19:7224431  | European,EastAsian,Chinese,AfricanAmerican,Hispanic,SouthernAsian                     | 6 | rs7248104          | INSR, LOC107985283          |
| 7:129663496 | European,AfricanAmerican,HispanicAmerican,SouthernAsian,Lebanese,EastAsian            | 6 | rs11556924         | ZC3HC1                      |
| 22:29451671 | European,AfricanAmerican,Filipino,Indian,Hispanic,SouthernAsian                       | 6 | rs4823006          | ZNRF3                       |
| 10:63462365 | European,AfricanAmerican,Asian,Hispanic,LatinAmerican,AfricanAmerican/Afro-Caribbean  | 6 | rs7922049          | C10orf107                   |
| 1:201801011 | European,Hispanic/Latino,EastAsian,AfricanAmerican,SouthernAsian,AfricanBritish       | 6 | rs2494114          | IPO9                        |
| 6:26104632  | European,AfricanAmerican,Asian,Hispanic,LatinAmerican,AfricanAmerican/Afro-Caribbean  | 6 | rs198851           | HIST1H4C - HIST1H1T         |
| 8:41509259  | Japanese,EastAsian,European,SouthernAsian,Mexican/Latino,Amish                        | 6 | rs12549902         | NKX6-3 - ANK1               |
| 18:20735408 | European,Filipino,AfricanAmerican/Afro-Caribbean,SouthernAsian,Seychellois,EastAsian  | 6 | rs4369779          | CABLES1                     |
| 1:201872264 | AfricanAmerican,Filipino,Indian,European,Japanese,Mixed                               | 6 | rs2820315          | LMOD1                       |
| 4:156639888 | European,AfricanAmerican,HispanicAmerican,SouthernAsian,Lebanese,EastAsian            | 6 | rs72689147         | GUCY1A3                     |
| 2:56111309  | Korean,European,AfricanAmerican,Filipino,Indian,EastAsian                             | 6 | rs3791675          | EFEMP1                      |
| 5:95716722  | European,Hispanic/Latino,EastAsian,AfricanAmerican,SouthernAsian,AfricanBritish       | 6 | rs7713317          | LOC101929710                |
| 6:126752874 | European,Filipino,AfricanAmerican/Afro-Caribbean,SouthernAsian,Seychellois,Seychelles | 6 | rs1538170          | CENPW                       |

|                  |                                                                                        |   |                     |                             |
|------------------|----------------------------------------------------------------------------------------|---|---------------------|-----------------------------|
| 16:53824<br>226  | European,AfricanAmerican,Asian,<br>Hispanic,LatinAmerican,African                      | 6 | rs62033406          | FTO                         |
| 15:66051<br>299  | European,Hispanic/Latino,EastAsi<br>an,AfricanAmerican,SouthAsian,A<br>fricanBritish   | 6 | rs12899850          | DENND4<br>A                 |
| 12:11186<br>5049 | European,AfricanAmerican,Asian,<br>Hispanic,LatinAmerican,African                      | 6 | rs7310615           | SH2B3                       |
| 12:11227<br>3499 | European,AfricanAmerican,Asian,<br>Hispanic,LatinAmerican,African                      | 6 | rs11513729          | ALDH2 -<br>MAPKAP<br>K5-AS1 |
| 1:109817<br>590  | AfricanAmerican,Afro-<br>Caribbean,European,British,Africa<br>nAmerican/Afro-Caribbean | 5 | rs12740374,CR105220 | CELSR2                      |
| 16:53800<br>568  | European,Filipino,AfricanAmerica<br>n/Afro-<br>Caribbean,SouthAsian,Seychellois        | 5 | rs9939973           | FTO                         |
| 20:64700<br>94   | European,Filipino,AfricanAmerica<br>n/Afro-<br>Caribbean,SouthAsian,Seychellois        | 5 | rs2326788           | CASC20                      |
| 11:11666<br>2579 | HanChinese,Japanese,Korean,Eas<br>tAsian                                               | 5 | rs651821            | ZNF259                      |
| 8:416304<br>05   | European,EastAsian,Malay,South<br>Asian,AfricanAmerican                                | 5 | rs4737009           | ANK1                        |
| 19:71847<br>62   | European,Filipino,AfricanAmerica<br>n/Afro-<br>Caribbean,SouthAsian,Seychellois        | 5 | rs891088            | INSR                        |
| 10:63467<br>553  | European,African,Asian,Hispanic,<br>Brazilian                                          | 5 | rs4590817           | C10orf10<br>7               |
| 3:531259<br>22   | European,Filipino,AfricanAmerica<br>n/Afro-<br>Caribbean,SouthAsian,Seychellois        | 5 | rs11242             | RFT1                        |
| 16:53809<br>247  | European,Filipino,AfricanAmerica<br>n/Afro-<br>Caribbean,SouthAsian,Seychellois        | 5 | rs1121980           | FTO                         |
| 17:29630<br>970  | European,Filipino,AfricanAmerica<br>n/Afro-<br>Caribbean,SouthAsian,Seychellois        | 5 | rs3087591           | EVI2B,<br>NF1               |
| 8:198309<br>21   | European,Orcadian,AfricanAmeri<br>can,Afro-Caribbean,Japanese                          | 5 | rs10096633          | LPL -<br>LOC1053<br>79311   |
| 19:19407<br>718  | European,Indian,EastAsian,Chines<br>e,Pakistani                                        | 5 | rs10401969          | SUGP1                       |
| 7:279595<br>7    | European,Filipino,AfricanAmerica<br>n/Afro-<br>Caribbean,SouthAsian,Seychellois        | 5 | rs798497            | GNA12,<br>AMZ1              |
| 1:184018<br>475  | AfricanAmerican,European,Filipin<br>o,Indian,EastAsian                                 | 5 | rs1926872           | COLGALT<br>2                |
| 12:11197<br>3358 | European,AfricanAmerican,Asian,<br>Hispanic,LatinAmerican                              | 5 | rs597808            | ATXN2                       |
| 2:277426         | European,Mexican,LatinAmerican                                                         | 5 | rs780093            | GCKR                        |

|              |                                                                         |   |            |                      |
|--------------|-------------------------------------------------------------------------|---|------------|----------------------|
| 03           | /Hispanic,EastAsian,Chinese                                             |   |            |                      |
| 3:51208646   | European,AfricanAmerican/Afro-Caribbean,Indian,Filipino,Hispanic/Latino | 5 | rs4378999  | DOCK3                |
| 11:116607437 | European,IndianAsian,Mexican,Indian,SaudiArabian                        | 5 | rs1558861  | APOA5 - APOA4        |
| 1:11839923   | European,AfricanAmerican,Asian,Hispanic,LatinAmerican                   | 5 | rs12561919 | C1orf167             |
| 1:96893000   | European,Filipino,AfricanAmerican/Afro-Caribbean,SouthAsian,Seychellois | 5 | rs11165623 | UBE2WP1 - EEF1A1P11  |
| 3:64708114   | European,Filipino,AfricanAmerican/Afro-Caribbean,SouthAsian,Seychellois | 5 | rs4132228  | ADAMTS9-AS2          |
| 1:109818530  | European,Orcadian,Finnish,SouthAsian,Japanese                           | 5 | rs646776   | CELSR2 - PSRC1       |
| 5:95728898   | European,Hispanic,Afro-Caribbean,Thai,FrenchCanadian                    | 5 | rs6235     | LOC101929710, PCSK1  |
| 7:2789880    | European,Filipino,AfricanAmerican/Afro-Caribbean,SouthAsian,Seychellois | 5 | rs798502   | GNA12, AMZ1          |
| 7:2772431    | European,Filipino,AfricanAmerican/Afro-Caribbean,SouthAsian,Seychellois | 5 | rs798528   | AMZ1, GNA12          |
| 8:11255575   | European,AfricanAmerican,Asian,Hispanic,LatinAmerican                   | 5 | rs9969423  | FAM167A-AS1          |
| 4:145825151  | European,Filipino,AfricanAmerican/Afro-Caribbean,SouthAsian,Seychellois | 5 | rs951252   | HSPD1P5 - ANAPC10    |
| 8:19819439   | European,Indian,Mexican,AfricanAmerican,Hispanic                        | 5 | rs326      | LPL                  |
| 8:126490972  | European,Indian,HanChinese,EastAsian,Chinese                            | 5 | rs2954029  | TRIB1 - LOC105375746 |
| 4:6289986    | European,EastAsian,SouthAsian,Mexican,Pakistani                         | 5 | rs4458523  | WFS1                 |
| 3:138103927  | AfricanAmerican,European,Filipino,Indian                                | 4 | rs1308362  | MRAS                 |
| 16:53825488  | European,AfricanAmerican,Filipino,Indian                                | 4 | rs9941349  | FTO                  |
| 1:109817838  | European,Indian,Mexican,LatinAmerican/Hispanic                          | 4 | rs660240   | CELSR2               |
| 16:53830465  | Sardinian,AfricanAmerican,Hispanic,European                             | 4 | rs9930506  | FTO                  |
| 15:58730498  | Filipino,EastAsian,European,Chinese                                     | 4 | rs588136   | LIPC, LOC101928694   |

|              |                                               |   |            |                          |
|--------------|-----------------------------------------------|---|------------|--------------------------|
| 3:27446285   | European,African,Asian,Hispanic               | 4 | rs13063291 | SLC4A7                   |
| 3:11400249   | European,SouthAsian,Hispanic,AfricanAmerican  | 4 | rs2606736  | ATG7                     |
| 16:53799977  | AfricanAmerican,European,Filipino,Indian      | 4 | rs9930333  | FTO                      |
| 11:116652423 | European,AfricanAmerican,Hispanic,Korean      | 4 | rs6589566  | ZNF259                   |
| 1:96886267   | AfricanAmerican,European,Filipino,Indian      | 4 | rs587242   | UBE2WP1 - EEF1A1P11      |
| 16:56997233  | European,EastAsian,Chinese,Kuwaiti            | 4 | rs1864163  | CETP                     |
| 19:33886354  | AfricanAmerican,European,Filipino,Indian      | 4 | rs7258031  | PEPD                     |
| 6:105364421  | AfricanAmerican,European,Filipino,Indian      | 4 | rs11156429 | LOC100422315 - LINC00577 |
| 6:26107463   | European,EastAsian,SouthAsian,AfricanAmerican | 4 | rs198846   | HIST1H4C - HIST1H1T      |
| 8:41519248   | SouthAsian,European,EastAsian,Pakistani       | 4 | rs516946   | ANK1                     |
| 5:131770805  | European,AfricanAmerican,Hispanic,SouthAsian  | 4 | rs2188962  | C5orf56                  |
| 8:23595940   | AfricanAmerican,Filipino,Indian,European      | 4 | rs7004766  | LOC107986930             |
| 5:131784393  | European,SouthAsian,Hispanic,AfricanAmerican  | 4 | rs12521868 | C5orf56                  |
| 4:145568352  | European,AfricanAmerican,Filipino,Indian      | 4 | rs7689420  | HHIP                     |
| 16:56989590  | European,Finnish,EastAsian,Chinese            | 4 | rs247616   | HERPUD1, CETP            |
| 4:156635309  | European,SouthAsian,Hispanic,AfricanAmerican  | 4 | rs7692387  | GUCY1A3                  |
| 3:64701890   | AfricanAmerican,European,Filipino,Indian      | 4 | rs4504165  | ADAMTS9-AS2              |
| 8:23593300   | AfricanAmerican,Filipino,Indian,European      | 4 | rs10101061 | LOC107986930             |
| 16:56990716  | AfricanAmerican,Hispanic,European             | 3 | rs247617   | HERPUD1, CETP            |
| 16:57005479  | European,Orcadian,Mexican                     | 3 | rs1532624  | CETP                     |
| 6:52452585   | EastAsian,European,Chinese                    | 3 | rs2239620  | TRAM2-AS1 - LOC724104    |

|                 |                                             |   |                    |                              |
|-----------------|---------------------------------------------|---|--------------------|------------------------------|
| 8:198857<br>26  | EastAsian,European,Chinese                  | 3 | rs11984636         | LPL -<br>LOC1053<br>79311    |
| 8:126488<br>250 | EastAsian,European,Chinese                  | 3 | rs2980869          | TRIB1 -<br>LOC1053<br>75746  |
| 8:126495<br>818 | EastAsian,European,Chinese                  | 3 | rs10808546         | TRIB1 -<br>LOC1053<br>75746  |
| 10:17260<br>290 | European,EastAsian,Chinese                  | 3 | rs10904908         | VIM-AS1                      |
| 3:274729<br>36  | European,AfricanAmerican,Hisp<br>anic       | 3 | rs3755652          | SLC4A7                       |
| 13:26781<br>528 | SouthAsian,European,EastAsian               | 3 | rs10507349         | RNF6                         |
| 22:44377<br>999 | Mexican,LatinAmerican/Hispanic,<br>European | 3 | rs2235776          | SAMM50                       |
| 8:126491<br>733 | Mexican,LatinAmerican/Hispanic,<br>European | 3 | rs2954031          | RP11-<br>136O12.<br>2        |
| 1:182150<br>978 | EastAsian,European,Chinese                  | 3 | rs1689797          | ZNF648                       |
| 1:631454<br>39  | EastAsian,European,Chinese                  | 3 | rs11208004         | DOCK7                        |
| 8:198193<br>28  | European,Indian,Japanese                    | 3 | rs325              | LPL                          |
| 7:116358<br>044 | European,EastAsian,Chinese                  | 3 | rs38855            | MET                          |
| 16:56995<br>236 | European,Filipino                           | 3 | rs1800775,CR000229 | CETP                         |
| 1:630942<br>07  | EastAsian,European,Chinese                  | 3 | rs11485618         | DOCK7                        |
| 19:19610<br>596 | SouthAsian,European,EastAsian               | 3 | rs3794991          | GATAD2<br>A                  |
| 16:57006<br>590 | Mexican,LatinAmerican/Hispanic,<br>European | 3 | rs7499892          | CETP                         |
| 4:627005<br>6   | European,SouthAsian,EastAsian               | 3 | rs4689388          | WFS1                         |
| 2:629244        | European,EastAsian,SouthEastAsi<br>an       | 3 | rs12463617         | LOC1053<br>73352 -<br>TMEM18 |
| 15:91521<br>337 | European,SouthAsian,EastAsian               | 3 | rs8042680          | PRC1,<br>PRC1-<br>AS1        |
| 11:61571<br>478 | EastAsian,European,Chinese                  | 3 | rs174550           | FADS1                        |
| 1:109822<br>166 | European,EastAsian,Chinese                  | 3 | rs599839           | CELSR2 -<br>PSRC1            |
| 1:150958<br>836 | European,EastAsian,Chinese                  | 3 | rs267733           | ANXA9                        |



|             |                                   |   |            |                      |
|-------------|-----------------------------------|---|------------|----------------------|
| 13:32953388 | European,EastAsian,Chinese        | 3 | rs4942486  | BRCA2                |
| 8:126481475 | European,AfricanAmerican,Filipino | 3 | rs2980879  | TRIB1 - LOC105375746 |
| 11:61549025 | EastAsian,European,Chinese        | 3 | rs174533   | MYRF                 |
| 1:63107526  | EastAsian,European,Chinese        | 3 | rs995000   | DOCK7                |
| 8:126482621 | European,EastAsian,Chinese        | 3 | rs2954022  | TRIB1 - LOC105375746 |
| 11:2213166  | European,SouthAsian,EastAsian     | 3 | rs7111341  | TH - ASCL2           |
| 9:22051670  | SouthAsian,European,EastAsian     | 3 | rs944801   | CDKN2B-AS1           |
| 1:63118196  | European,Orcadian,Japanese        | 3 | rs10889353 | DOCK7                |
| 5:122476457 | EastAsian,European,SouthAsian     | 3 | rs13359291 | PRDM6                |
| 8:19848080  | AfricanAmerican,Hispanic,European | 3 | rs17410962 | LPL - LOC105379311   |
| 11:61570783 | European,EastAsian                | 2 | rs174547   | FADS1                |
| 2:21286057  | European,Indian                   | 2 | rs515135   | APOB - TDRD15        |
| 8:126482077 | EastAsian,Japanese                | 2 | rs2954021  | TRIB1 - LOC105375746 |
| 4:6303022   | European,Pakistani                | 2 | rs1801214  | WFS1                 |
| 8:19824667  | European,British                  | 2 | rs15285    | LPL                  |
| 19:11163601 | European,Mixed                    | 2 | rs1122608  | SMARCA4              |
| 1:63049551  | HanChinese,European               | 2 | rs11207995 | DOCK7                |
| 8:19819724  | HanChinese,European               | 2 | rs328      | LPL                  |
| 8:19827848  | European,Indian                   | 2 | rs10105606 | LPL - LOC105379311   |
| 2:21241505  | AfricanAmerican,Hispanic          | 2 | rs12713956 | APOB                 |
| 8:126479362 | SaudiArabian,Japanese             | 2 | rs6982502  | TRIB1 - LOC105375746 |
| 1:177913519 | European,AfricanAmerican          | 2 | rs10913469 | SEC16B               |

|                  |                          |   |                     |                              |
|------------------|--------------------------|---|---------------------|------------------------------|
| 3:647033<br>94   | AfricanAmerican,European | 2 | rs66815886          | ADAMTS<br>9-AS2              |
| 6:126851<br>160  | European,British         | 2 | rs1490384           | MIR588 -<br>RNU6-<br>200P    |
| 2:633660         | African,European         | 2 | rs62105306          | LOC1053<br>73352 -<br>TMEM18 |
| 2:275980<br>97   | AfricanAmerican,Hispanic | 2 | rs4665972           | SNX17                        |
| 9:221255<br>03   | European,HanChinese      | 2 | rs1333049           | CDKN2B-<br>AS1 -<br>DMRTA1   |
| 11:11664<br>7607 | European,EastAsian       | 2 | rs2160669           | ZNF259                       |
| 11:11658<br>4987 | European,Indian          | 2 | rs4938303           | LOC1019<br>29011 -<br>BUD13  |
| 3:647053<br>65   | European,Pakistani       | 2 | rs6795735           | ADAMTS<br>9-AS2              |
| 11:61573<br>684  | European,Japanese        | 2 | rs174551            | FADS1                        |
| 2:621558         | Japanese,European        | 2 | rs939584            | LOC1053<br>73352 -<br>TMEM18 |
| 16:53842<br>908  | Japanese,EastAsian       | 2 | rs12149832          | FTO                          |
| 15:91544<br>076  | European,Pakistani       | 2 | rs12899811          | VPS33B                       |
| 2:644953         | European,AfricanAmerican | 2 | rs7561317           | LOC1053<br>73352 -<br>TMEM18 |
| 10:94465<br>559  | Mixed,European           | 2 | rs5015480           | HHEX -<br>EXOC6              |
| 16:56988<br>044  | European                 | 1 | rs173539            | HERPUD<br>1, CETP            |
| 11:11666<br>0686 | European                 | 1 | rs2266788           | ZNF259                       |
| 16:56987<br>369  | Japanese                 | 1 | rs56156922          | HERPUD<br>1, CETP            |
| 16:56994<br>528  | European                 | 1 | rs17231506,CR057853 | CETP                         |
| 11:11663<br>9104 | European                 | 1 | rs10790162          | BUD13                        |
| 11:11665<br>2491 | Japanese                 | 1 | rs7483863           | ZNF259                       |
| 11:11665<br>3296 | European                 | 1 | rs2075290           | ZNF259                       |
| 16:56993<br>886  | European                 | 1 | rs821840            | CETP                         |

|                  |            |   |            |                                        |
|------------------|------------|---|------------|----------------------------------------|
| 16:57002<br>732  | Japanese   | 1 | rs9939224  | CETP                                   |
| 3:647102<br>53   | European   | 1 | rs918466   | ADAMTS<br>9-AS2                        |
| 3:185317<br>674  | European   | 1 | rs12374077 | SENP2                                  |
| 1:163416<br>49   | European   | 1 | rs1048238  | HSPB7                                  |
| 2:286357<br>40   | European   | 1 | rs7562     | FOSL2                                  |
| 2:164444<br>356  | Japanese   | 1 | rs77559470 | LOC1079<br>85829 -<br>FIGN             |
| 6:105407<br>662  | European   | 1 | rs314277   | LIN28B                                 |
| 12:10287<br>5569 | European   | 1 | rs35767    | IGF1                                   |
| 17:68090<br>207  | European   | 1 | rs11867479 | KCNJ16                                 |
| 9:221244<br>77   | European   | 1 | rs10757278 | CDKN2B-<br>AS1 -<br>DMRTA1             |
| 10:94466<br>439  | Japanese   | 1 | rs12219514 | HHEX -<br>EXOC6                        |
| 2:212705<br>54   | European   | 1 | rs585967   | APOB -<br>TDRD15                       |
| 2:624034         | European   | 1 | rs6711012  | LOC1053<br>73352 -<br>TMEM18           |
| 3:135926<br>622  | European   | 1 | rs645040   | RPL31P2<br>3 - PCCB                    |
| 8:126486<br>409  | European   | 1 | rs17321515 | TRIB1 -<br>LOC1053<br>75746            |
| 2:212440<br>00   | European   | 1 | rs10199768 | APOB                                   |
| 1:555173<br>01   | Japanese   | 1 | rs45576433 | PCSK9                                  |
| 3:274572<br>08   | European   | 1 | rs11716531 | SLC4A7                                 |
| 12:98336<br>28   | European   | 1 | rs3764021  | CLEC2D                                 |
| 17:37745<br>979  | Kuwaiti    | 1 | rs11654954 | LOC1053<br>71770 -<br>LOC1053<br>71771 |
| 5:746047<br>42   | HanChinese | 1 | rs6871667  | ANKRD3<br>1 -<br>HMGCR                 |
| 19:10765         | EastAsian  | 1 | rs7250071  | ILF3                                   |

|                 |           |   |             |                                  |
|-----------------|-----------|---|-------------|----------------------------------|
| 819             |           |   |             |                                  |
| 8:198245<br>63  | Japanese  | 1 | rs1059611   | LPL                              |
| 6:126698<br>719 | European  | 1 | rs9388489   | CENPW                            |
| 2:204738<br>919 | European  | 1 | rs3087243   | CTLA4 -<br>LOC1019<br>27840      |
| 9:220880<br>94  | SaudiArab | 1 | rs10738607  | CDKN2B-<br>AS1                   |
| 3:499137<br>05  | European  | 1 | rs36022378  | ACTBP13                          |
| 12:48409<br>054 | European  | 1 | rs12819124  | LOC1053<br>69750                 |
| 16:53845<br>487 | European  | 1 | rs11642841  | FTO                              |
| 2:647861        | European  | 1 | rs4854349   | LOC1053<br>73352 -<br>TMEM18     |
| 20:64695<br>96  | European  | 1 | rs17721822  | CASC20                           |
| 1:109819<br>296 | Mexican   | 1 | rs3902354   | CELSR2 -<br>PSRC1                |
| 3:136107<br>549 | European  | 1 | rs9880211   | STAG1                            |
| 2:630323        | European  | 1 | rs6725549   | LOC1053<br>73352 -<br>TMEM18     |
| 8:198326<br>46  | European  | 1 | rs17482753  | LPL -<br>LOC1053<br>79311        |
| 2:278155<br>10  | European  | 1 | rs13022873  | ZNF512                           |
| 2:278017<br>59  | European  | 1 | rs1919128   | C2orf16                          |
| 7:117705<br>257 | Kuwaiti   | 1 | rs39745     | CTTNBP2<br>-<br>LOC1053<br>75470 |
| 6:126712<br>247 | British   | 1 | rs1578060   | CENPW                            |
| 8:126506<br>694 | European  | 1 | rs112875651 | TRIB1 -<br>LOC1053<br>75746      |
| 14:68813<br>115 | European  | 1 | rs1570106   | RAD51B                           |
| 1:938545<br>17  | Japanese  | 1 | rs2114273   | LOC1004<br>21273 -<br>FNBP1L     |
| 2:214282        | British   | 1 | rs71435601  | TDRD15 -                         |

|                  |           |   |            |                                     |
|------------------|-----------|---|------------|-------------------------------------|
| 89               |           |   |            | LOC1053<br>74317                    |
| 16:53800<br>754  | European  | 1 | rs9940128  | FTO                                 |
| 2:624678         | European  | 1 | rs2903492  | LOC1053<br>73352 -<br>TMEM18        |
| 1:630859<br>97   | British   | 1 | rs12239736 | DOCK7                               |
| 1:969447<br>97   | European  | 1 | rs1555543  | EEF1A1P<br>11 -<br>LOC1053<br>78866 |
| 17:37807<br>698  | Kuwaiti   | 1 | rs9972882  | STARD3                              |
| 8:198497<br>57   | European  | 1 | rs17091905 | LPL -<br>LOC1053<br>79311           |
| 8:126484<br>526  | European  | 1 | rs2954026  | TRIB1 -<br>LOC1053<br>75746         |
| 15:73485<br>160  | European  | 1 | rs11072405 | NEO1                                |
| 18:57852<br>948  | European  | 1 | rs11152213 | RNU4-<br>17P -<br>LOC3427<br>84     |
| 9:220770<br>85   | British   | 1 | rs10811652 | CDKN2B-<br>AS1                      |
| 11:11667<br>0676 | European  | 1 | rs6589567  | APOA5 -<br>APOA4                    |
| 6:126990<br>392  | British   | 1 | rs6918725  | LOC1053<br>77992                    |
| 19:11229<br>218  | EastAsian | 1 | rs2738452  | LDLR                                |
| 4:145565<br>826  | EastAsian | 1 | rs6845999  | HHIP                                |
| 8:126493<br>746  | European  | 1 | rs2954033  | TRIB1 -<br>LOC1053<br>75746         |
| 2:278519<br>18   | European  | 1 | rs3749147  | GPN1                                |
| 14:24830<br>850  | European  | 1 | rs1950500  | RIPK3 -<br>NFATC4                   |
| 3:531187<br>39   | European  | 1 | rs2336725  | RFT1                                |
| 20:40985<br>67   | European  | 1 | rs7273787  | RPL21P2<br>- SMOX                   |
| 16:81524<br>274  | European  | 1 | rs12443634 | CMIP                                |

|                  |             |   |            |                                        |
|------------------|-------------|---|------------|----------------------------------------|
| 6:126752<br>884  | European    | 1 | rs1538171  | CENPW                                  |
| 12:90643<br>524  | European    | 1 | rs10777237 | LOC1053<br>69890 -<br>LOC1053<br>69892 |
| 10:11480<br>8072 | European    | 1 | rs10885409 | TCF7L2                                 |
| 3:531255<br>85   | European    | 1 | rs2564921  | RFT1                                   |
| 19:86440<br>31   | European    | 1 | rs4072910  | MYO1F -<br>ADAMTS<br>10                |
| 6:126966<br>308  | European    | 1 | rs4549631  | PRELID1<br>P1 -<br>LOC1053<br>77992    |
| 19:11224<br>265  | Japanese    | 1 | rs5930     | LDLR                                   |
| 6:126866<br>133  | European    | 1 | rs1155939  | MIR588 -<br>RNU6-<br>200P              |
| 4:145839<br>264  | European    | 1 | rs4240326  | HSPD1P5<br>-<br>ANAPC1<br>0            |
| 11:11665<br>7561 | Hispanic    | 1 | rs3741298  | ZNF259                                 |
| 4:145643<br>079  | European    | 1 | rs6854783  | HHIP                                   |
| 4:156638<br>573  | European    | 1 | rs2306556  | GUCY1A<br>3                            |
| 6:126717<br>064  | Mixed       | 1 | rs1591805  | CENPW                                  |
| 5:131686<br>146  | European    | 1 | rs10058074 | LOC5531<br>03                          |
| 1:630782<br>22   | European    | 1 | rs10889348 | DOCK7                                  |
| 4:145650<br>021  | European    | 1 | rs1492820  | HHIP                                   |
| 8:198453<br>76   | EastAsian   | 1 | rs7841189  | LPL -<br>LOC1053<br>79311              |
| 20:39672<br>618  | European    | 1 | rs6029526  | TOP1                                   |
| 5:746254<br>87   | Micronesian | 1 | rs7703051  | ANKRD3<br>1 -<br>HMGCR                 |
| 1:182144<br>119  | European    | 1 | rs2489279  | ZNF648                                 |

|                 |            |   |             |                              |
|-----------------|------------|---|-------------|------------------------------|
| 11:61569<br>830 | European   | 1 | rs174546    | FADS1                        |
| 2:169791<br>438 | European   | 1 | rs552976    | ABCB11                       |
| 1:630495<br>93  | European   | 1 | rs1748195   | DOCK7                        |
| 9:429008<br>5   | EastAsian  | 1 | rs4237150   | GLIS3                        |
| 11:61579<br>463 | European   | 1 | rs174554    | FADS1                        |
| 7:276310<br>2   | European   | 1 | rs798544    | AMZ1                         |
| 7:286998<br>5   | European   | 1 | rs1182188   | GNA12                        |
| 1:630498<br>19  | HanChinese | 1 | rs12042319  | DOCK7                        |
| 3:647022<br>75  | European   | 1 | rs4616635   | ADAMTS<br>9-AS2              |
| 20:41018<br>00  | European   | 1 | rs1741344   | RPL21P2<br>- SMOX            |
| 1:109818<br>306 | European   | 1 | rs629301    | CELSR2                       |
| 2:212883<br>21  | European   | 1 | rs562338    | APOB,<br>LOC1002<br>87183    |
| 17:37832<br>366 | Kuwaiti    | 1 | rs2934952   | PGAP3                        |
| 16:57000<br>938 | Mexican    | 1 | rs118146573 | CETP                         |
| 22:38577<br>515 | Mixed      | 1 | rs2277844   | PLA2G6                       |
| 2:213190<br>16  | British    | 1 | rs672889    | APOB -<br>TDRD15             |
| 2:634905        | European   | 1 | rs6548238   | LOC1053<br>73352 -<br>TMEM18 |
| 9:221152<br>86  | Japanese   | 1 | rs944797    | CDKN2B-<br>AS1               |
| 2:630075        | British    | 1 | rs73139123  | LOC1053<br>73352 -<br>TMEM18 |
| 8:199421<br>81  | Japanese   | 1 | rs13263508  | LOC1053<br>79311             |
| 15:74241<br>506 | European   | 1 | rs750460    | LOXL1                        |
| 8:198244<br>92  | European   | 1 | rs13702     | LPL                          |
| 9:220310<br>05  | European   | 1 | rs7865618   | CDKN2B-<br>AS1               |
| 4:822203        | EastAsian  | 1 | rs2011962   | PRKG2 -                      |

|             |                                          |   |            |                       |
|-------------|------------------------------------------|---|------------|-----------------------|
| 24          |                                          |   |            | RNU5A-2P              |
| 16:56987765 | European                                 | 1 | rs56228609 | HERPUD1, CETP         |
| 16:56993161 | European                                 | 1 | rs12149545 | CETP                  |
| 8:126500031 | European                                 | 1 | rs28601761 | RP11-136O12.2         |
| 16:56999328 | Multi-ethnic cohort but largely European | 1 | rs11508026 | CETP                  |
| 16:56996211 | European                                 | 1 | rs711752   | CETP                  |
| 19:11227480 | European                                 | 1 | rs2738447  | LDLR                  |
| 18:57854694 | European                                 | 1 | rs34633411 | RNU4-17P - LOC342784  |
| 2:21419650  | European, Mixed                          | 2 | rs10221742 | TDRD15 - LOC105374317 |
| 20:47456856 | European, Mixed                          | 2 | rs56313611 | LOC105372648          |
| 2:21291529  | Multi-ethnic cohort but largely European | 1 | rs668948   | APOB, LOC100287183    |
| 5:74262162  | Multi-ethnic cohort but largely European | 1 | rs4703642  | LOC105379040          |
| 3:135888642 | European, Mixed                          | 2 | rs73222236 | MSL2                  |
| 8:126500350 | European, Mixed                          | 2 | rs8180991  | TRIB1 - LOC105375746  |
| 9:124412948 | European, Mixed                          | 2 | rs10818576 | DAB2IP                |
| 1:109821511 | European                                 | 1 | rs602633   | CELSR2 - PSRC1        |
| 8:19843171  | European, Mixed                          | 2 | rs17091891 | LPL - LOC105379311    |
| 1:169094459 | European, Mixed                          | 2 | rs1892094  | ATP1B1                |
| 9:124420173 | Mixed                                    | 1 | rs885150   | DAB2IP                |
